# Supplementary material for: Factors Secreted by Cancer-Associated Fibroblasts that Sustain Cancer Stem Properties in Head and Neck Squamous Carcinoma Cells as Potential Therapeutic Targets
Source: PubMed Central journal article supplement (PMC6162704; doi:10.3390/cancers10090334), 2018-09-17
Supplement: cancers-10-00334-s001.pdf [file cancers-10-00334-s001.pdf]

## Supplementary materials: Factors Secreted by Cancer-Associated Fibroblasts that Sustain Cancer Stem Properties in Head and Neck Squamous Carcinoma Cells as Potential Therapeutic Targets

Saúl Álvarez-Teijeiro, Cristina García-Inclán, M. Ángeles Villaronga, Pedro Casado, Francisco Hermida-Prado, Rocío Granda-Díaz, Juan P. Rodrigo, Fernando Calvo, Nagore del-Río-Ibisate, Alberto Gandarillas, Francisco Moris, Mario Hermsen, Pedro Cutillas and Juana M. García-Pedrero

**Table S1.** Primers used for real-time RT-PCR (5'→3').

| Genes         | Forward                  | Reverse                    |
|---------------|--------------------------|----------------------------|
| <i>ABCG2</i>  | ATGGATTTACGGCTTIGCAG     | TCTTCGCCAGTACATGTTGC       |
| <i>ALDH1</i>  | AACAGTGTGGGTGAATTGCT     | GGAAACCGTACTCTCCCAGT       |
| <i>BMI1</i>   | CTGGAGAAGGAATGGTCCAC     | CACTTCCAGTCTCCAGCA         |
| <i>CD133</i>  | CAGTGAGAAAGTGGCATCGT     | TCCTATGCCAAACCAAACA        |
| <i>CD44</i>   | GATCATCTTGGCATCCCTCT     | TGAGTCCACTTGGCTTTCTG       |
| <i>NANOG</i>  | TGCTTATTCAGGACAGCCCT     | TCTGGTCTTCTGTTTCTTACT      |
| <i>NESTIN</i> | CAGCGTTGGAACAGAGGTTG     | GCTGGCACAGGTGTCTCAAG       |
| <i>NOTCH1</i> | AGACGGCATCAACACGGCCTTC   | GTGTAGCTGTCCACGCAGTCCG     |
| <i>OCT4</i>   | GGCAACCTGGAGAATTTGTT     | ACTCGGACCACATCCTTCTC       |
| <i>RPL19</i>  | GCGGAAGGGTACAGCCAAT      | GCAGCCGGCGCAA              |
| <i>SOX2</i>   | TCAGGAGTTGTCAAGGCAGAGAAG | CTCAGTCCTAGTCTTAAAGAGGCAGC |
